# Supplementary material
Source: ML conference proceedings conference paper supplement (https://openreview.net/forum?id=KGEMdGRSUx)
Supplement: supplementary_material [file attachment]

# (Supplementary Materials) Neighbor Does Matter: Global Positive-Negative Sampling for Vision-Language Pre-training

Anonymous Authors

**Table 1: Results on fine-tune(FT) and zero-shot(ZS) retrieval tasks on Flickr30k dataset.**

| Method | Flickr30k-FT |             | Flickr30k-ZS |             |
|--------|--------------|-------------|--------------|-------------|
|        | TR@1         | IR@1        | TR@1         | IR@1        |
| ALBEF  | 94.3         | 82.8        | 90.5         | 76.8        |
| +ours  | <b>94.9</b>  | <b>83.2</b> | <b>92.8</b>  | <b>78.7</b> |
| TCL    | 94.9         | 84.0        | 93.0         | 79.6        |
| +ours  | <b>95.8</b>  | <b>84.7</b> | <b>93.1</b>  | <b>79.9</b> |

This Supplementary Material presents the results of fine-tune and zero-shot retrieval tasks on the Flickr30k[1] dataset in Table 1. Additionally, the pseudocode of GPN-S is provided in Algorithm 1.

---

## Algorithm 1 Global Positive-Negative Sampling.

---

**Input:** 1) dataset with  $D$  image-text pairs  $\{(v_i, t_i)\}_{i=1}^D$ .  
 2) an off-the-shelf pre-trained model that consists of a visual encoder  $g_V(\cdot)$  and a text encoder  $g_T(\cdot)$ .  
 3) the model  $f$ .

1: % encoding image and text by the off-the-shelf encoders  
 2:  $\mathbf{V} = \{\mathbf{v}_i^g\}_{i=1}^D = \{g_V(v_i)\}_{i=1}^D$   
 3:  $\mathbf{T} = \{\mathbf{t}_i^g\}_{i=1}^D = \{g_T(t_i)\}_{i=1}^D$   
 4: % calculating neighbors and clusters  
 5:  $V2V_k, V2T_k, T2V_k = \text{Retrieve\_Topk\_Neighbor}(\mathbf{V}, \mathbf{T})$   
 6:  $\text{Clusters} = \text{KMeans}(\mathbf{V})$   
 7: % calculating global positive samples  
 8: **for all**  $(v_i, t_i)$  **do**  
 9:   calculate  $obj(v_i)$  by equation (7)  
 10:    $t_i^r = ' '.join(obj(v_i))$   
 11:   calculate  $SE_i$  by equation (9)  
 12: **end for**  
 13: % training.  
 14: **for all** Epoch **do**  
 15:   % organizing a  $N$ -pair batch with hard negatives  
 16:    $\mathcal{B} = \text{GN\_S}(\{(v_i, t_i)\}_{i=1}^D, \text{Clusters})$   
 17:   **for all**  $B_j \in \mathcal{B}$  **do**  
 18:     % GP-S  
 19:     **for all**  $(v_i, t_i) \in B_j$  **do**  
 20:        $v_i^{\text{pos}} = \text{Random\_choice}(SE_i)$   
 21:       % equation (8)  
 22:       **if**  $(\mathbf{v}_i^g)^T \mathbf{t}_i^g < \alpha$  **then**  
 23:          $t_i = t_i^r$   
 24:       **end if**  
 25:     **end for**  
 26:      $v = \{v_i\}_{i=1}^N$   
 27:      $v^{\text{pos}} = \{v_i^{\text{pos}}\}_{i=1}^N$   
 28:      $t = \{t_i\}_{i=1}^N$   
 29:     % equation (10), (11)  
 30:      $\mathcal{L}(v, t, v^{\text{pos}}) = \mathcal{L}_f(v, t) + \mathcal{L}_{\text{uni}}(v, v^{\text{pos}})$   
 31:      $\mathcal{L}.\text{backward}()$   
 32:   **end for**  
 33: **end for**

---

## REFERENCES

- [1] Bryan A Plummer, Liwei Wang, Chris M Cervantes, Juan C Caicedo, Julia Hockenmaier, and Svetlana Lazebnik. 2015. Flickr30k entities: Collecting region-to-phrase correspondences for richer image-to-sentence models. In *Proceedings of the IEEE international conference on computer vision*. 2641–2649.
